# Supplementary material
Source: PubMed Central journal article supplement (PMC6641118)
Supplement: ao7b00492_si_001.pdf [file ao7b00492_si_001.pdf]

## Supporting information

### **Coupling of Crumpled-Type Novel MoS<sub>2</sub> with CeO<sub>2</sub> Nanoparticles: A Noble-Metal-Free p–n Heterojunction Composite for Visible Light Photocatalytic H<sub>2</sub> Production**

Gayatri Swain<sup>a</sup>, Sabiha Sultana<sup>a</sup>, Brundabana Naik<sup>a</sup>, Kulamani Parida<sup>a\*</sup>

<sup>a</sup>Centre for Nano Science and Nanotechnology, Siksha O Anusnadhan University, Bhubaneswar

Jagamara, Bhubanswar-751030, Odisha, India

Corresponding Authors: [kulamaniparida@soauniversity.com](mailto:kulamaniparida@soauniversity.com)

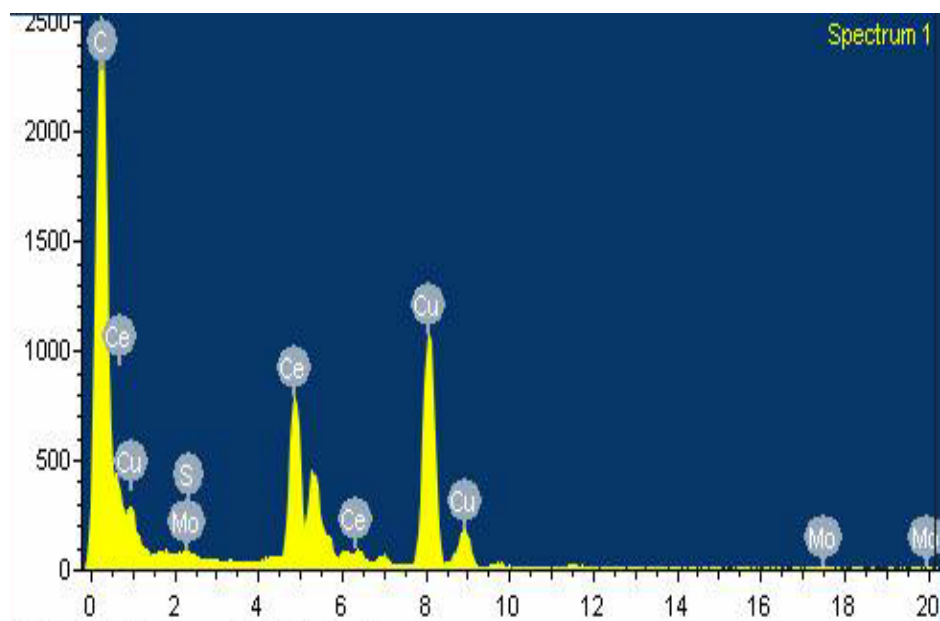

Figure S1. Energy Dispersive X-ray spectra of 2% MoS<sub>2</sub>/CeO<sub>2</sub> nanocomposite

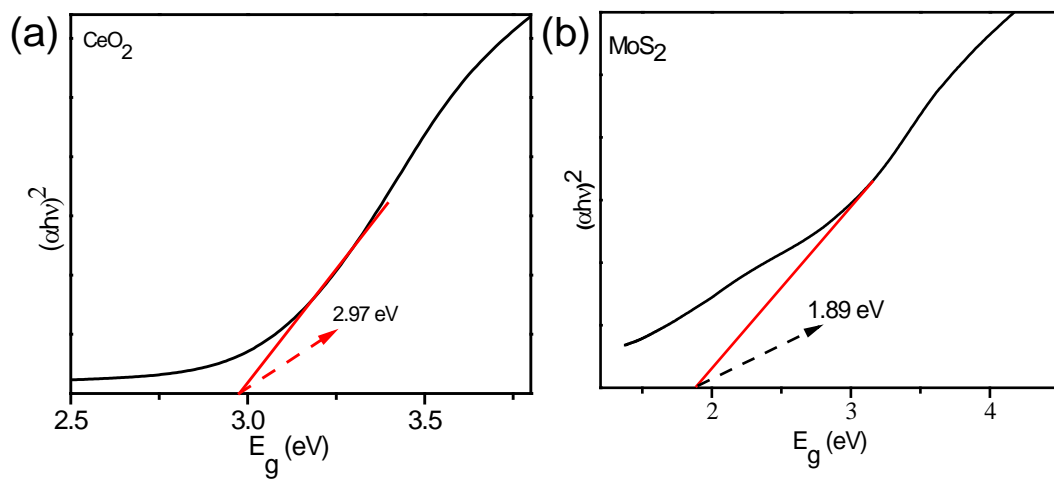

Figure S2. Band gap potential of (a) CeO<sub>2</sub> (b) MoS<sub>2</sub>

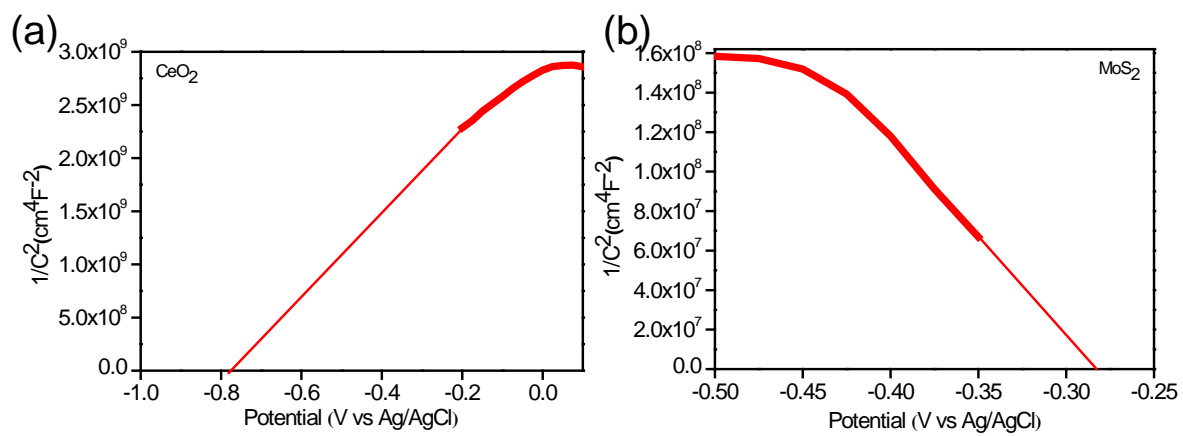

Figure S3. Mott-Schottky plot of (a) CeO<sub>2</sub> (b) MoS<sub>2</sub>
